# Supplementary material for: Endothelial Notch signaling controls insulin transport in muscle
Source: PubMed Central journal article supplement (PMC7136962; doi:10.15252/emmm.201809271), 2020-03-18

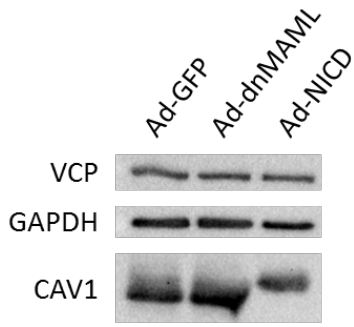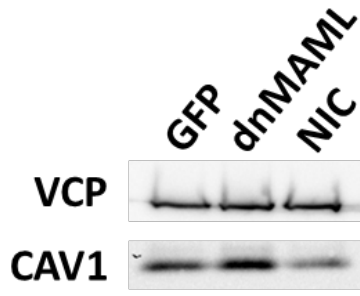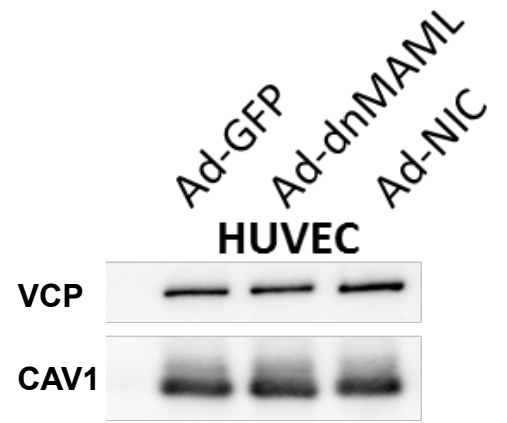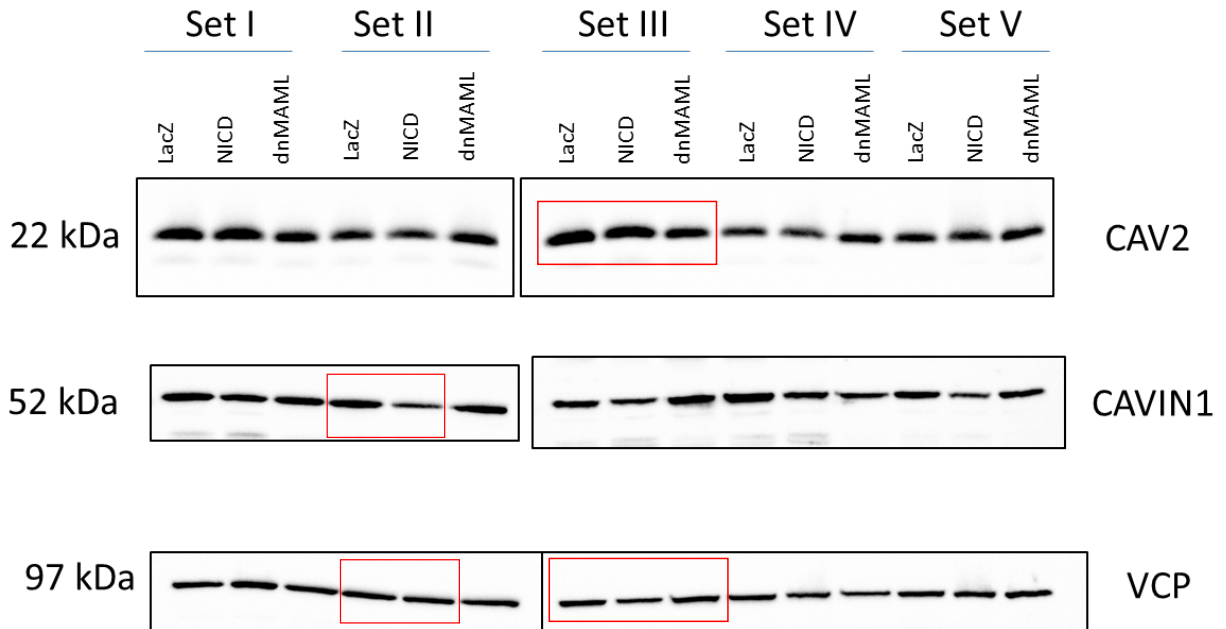

Supplement: EMMM-12-e09271-s004.pdf [file EMMM-12-e09271-s004.pdf]
